# Supplementary material
Source: MDPI journal article supplement (https://www.mdpi.com/1424-8247/15/12/1576)
Supplement: s1 [file s1]

## **Supplementary Materials**

### **Anti-diabetic Potential of Novel 1,3,5-Trisubstituted-2-Thioxoimidazolidin-4-one Analogues: Insights into $\alpha$ -Glucosidase, $\alpha$ -Amylase, and Antioxidant Activities**

Salma M. Khirallah <sup>1</sup>, Heba M. M. Ramadan <sup>2</sup>, Hossam Aladl Aladl Aladl <sup>3</sup>, Najla O Ayaz <sup>4</sup>, Lina A.F Kurdi <sup>5</sup>, Mariusz Jaremko <sup>6</sup>, Samar Zuhair Alshawwa <sup>7</sup>, and Essa M. Saied <sup>8,9,\*</sup>

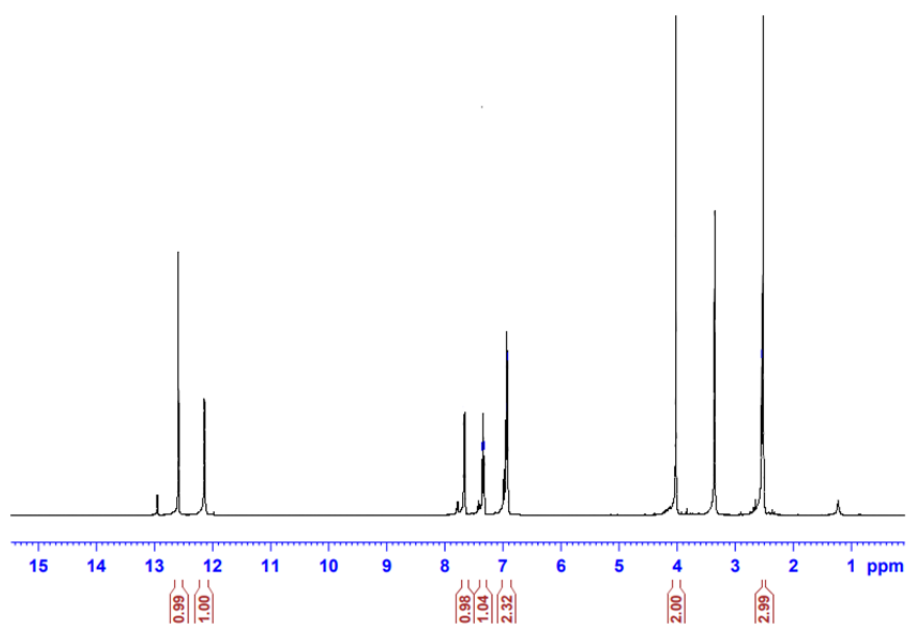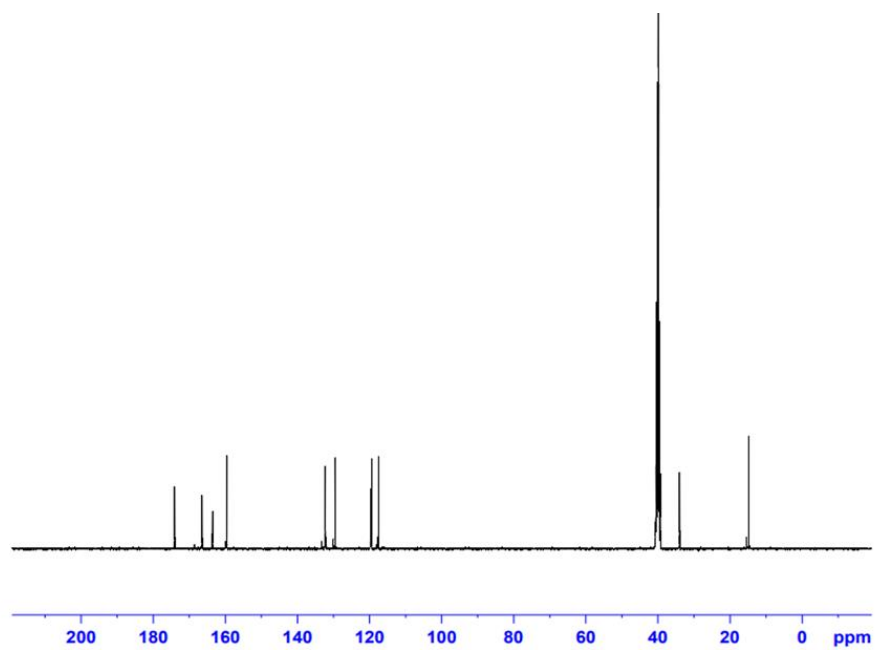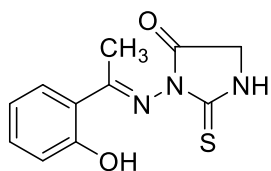

Figure S1. <sup>1</sup>H NMR and <sup>13</sup>C NMR spectra of compound 3

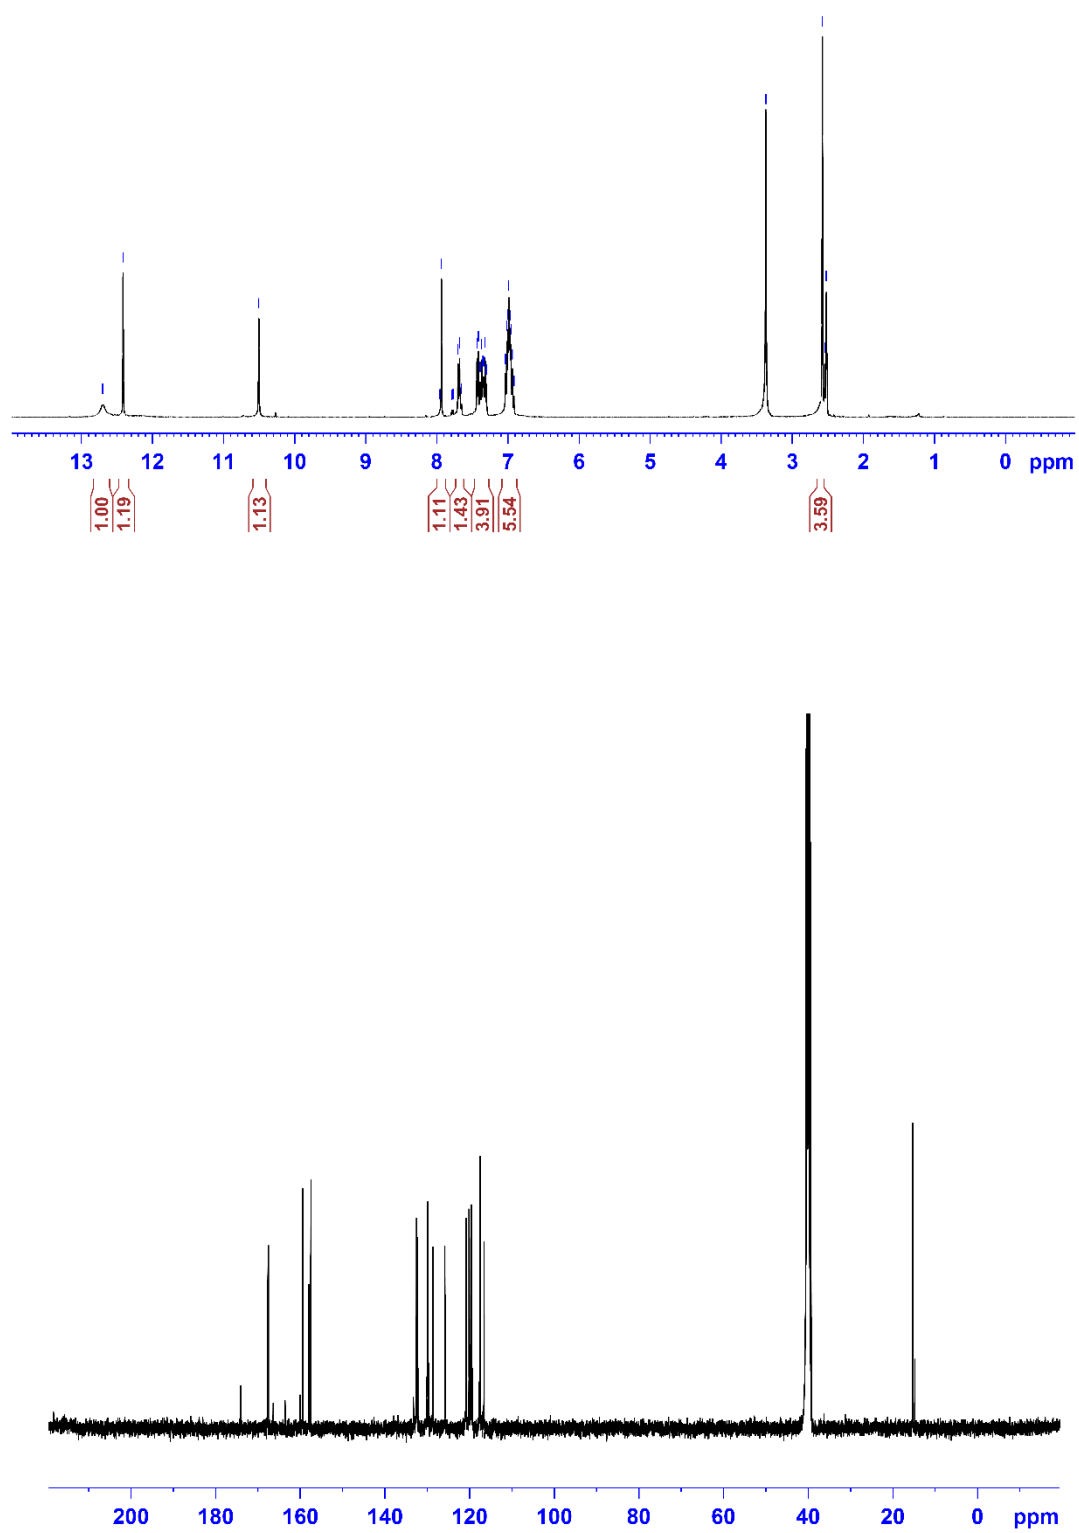

Figure S2a.  $^1\text{H}$  NMR and  $^{13}\text{C}$  NMR spectra of compound 4a

Mass spectrum of compound 10. The x-axis represents the mass-to-charge ratio ( $m/z$ ) from 50 to 450, and the y-axis represents relative intensity from 0 to 4,000,000. The base peak is at  $m/z$  250.9. Other significant peaks are labeled at  $m/z$  51.0, 91.0, 133.0, 174.9, 209.9, 309.9, 351.9, 384.7, 418.8, 449.8, and 481.8.

Cc1nc2c(nc(=O)[nH]2S)c3ccccc3O1=Cc4ccccc4O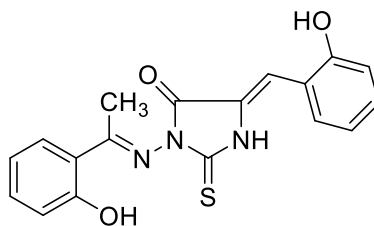

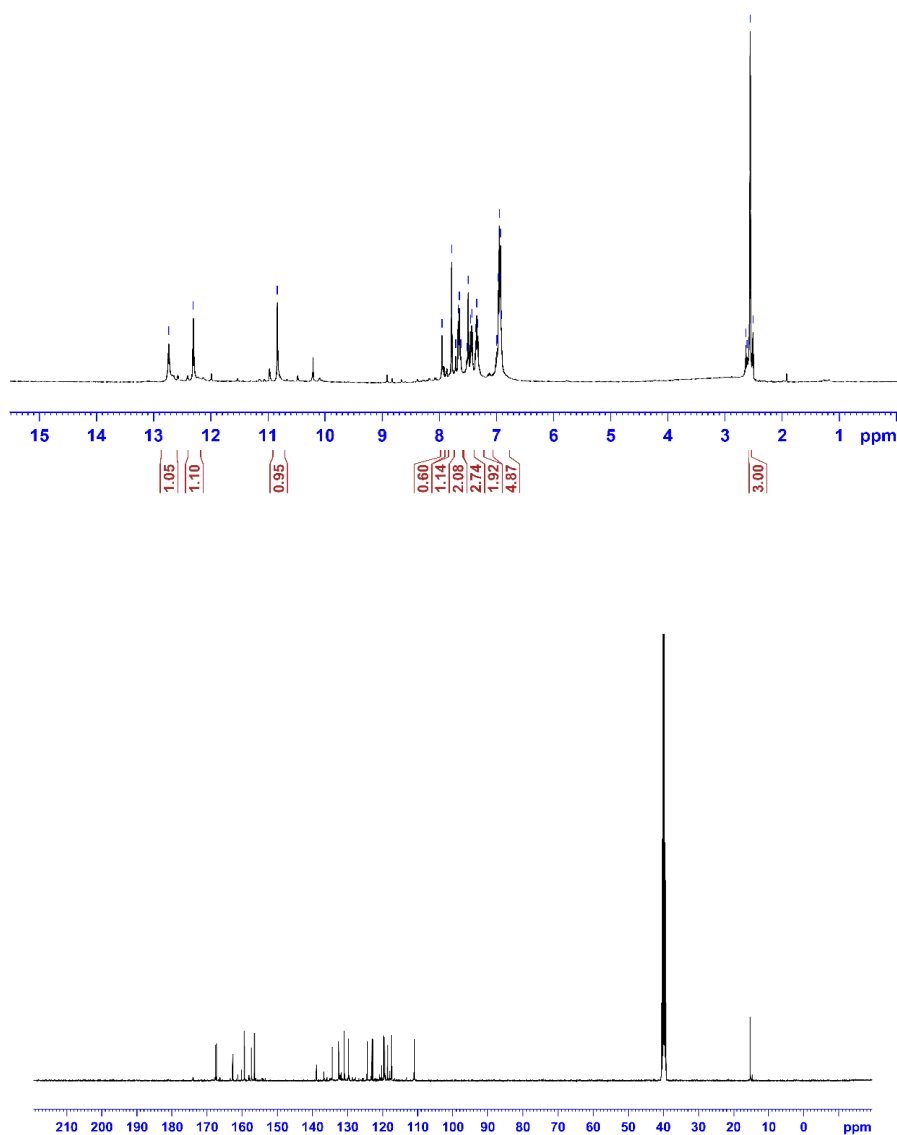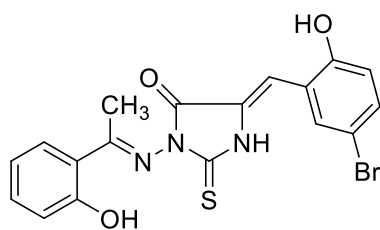

Figure S3.  $^1\text{H}$  NMR and  $^{13}\text{C}$  NMR spectra of compound 4b

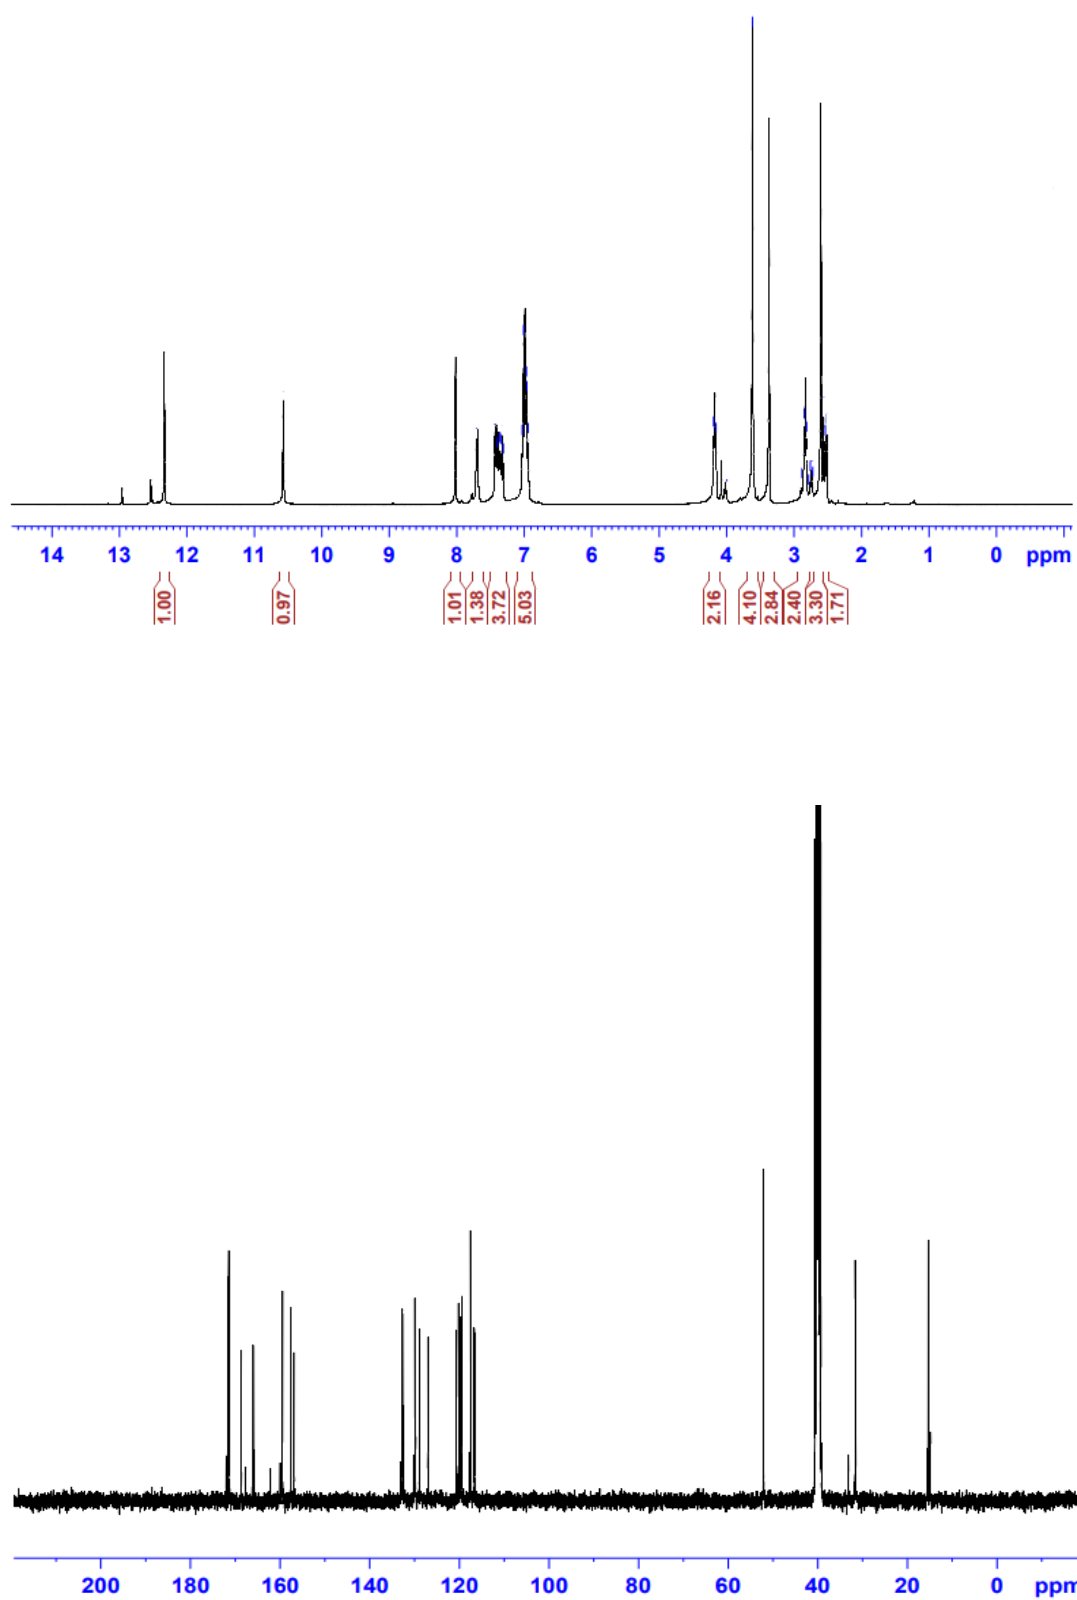

Figure S4a.  $^1\text{H}$  NMR and  $^{13}\text{C}$  NMR spectra of compound 5a

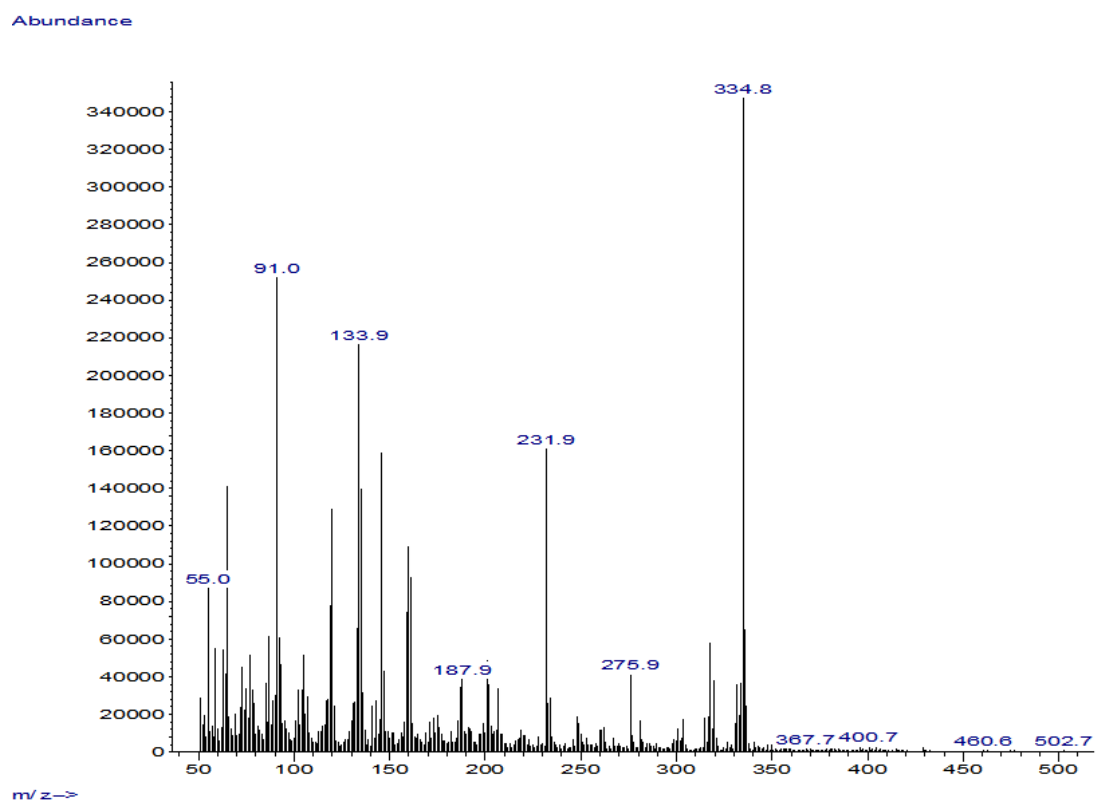

Figure S4b. Mass spectrum of compound 5a

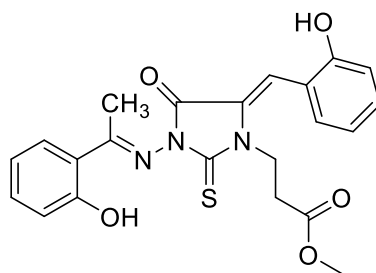

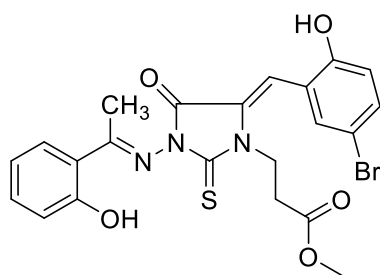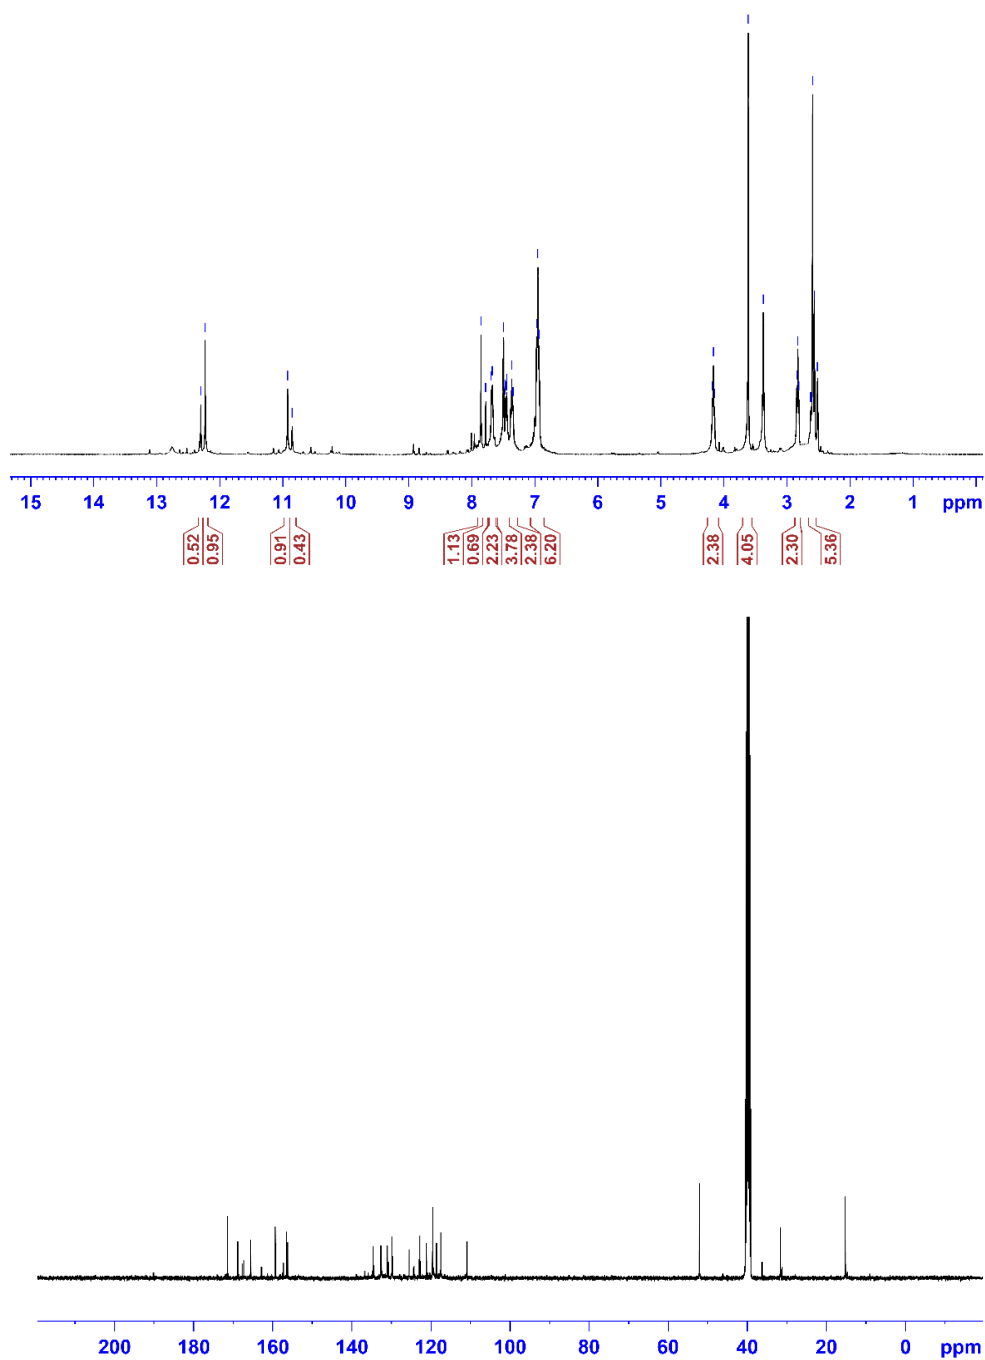

Figure S5. <sup>1</sup>H NMR and <sup>13</sup>C NMR spectra of compound 5b



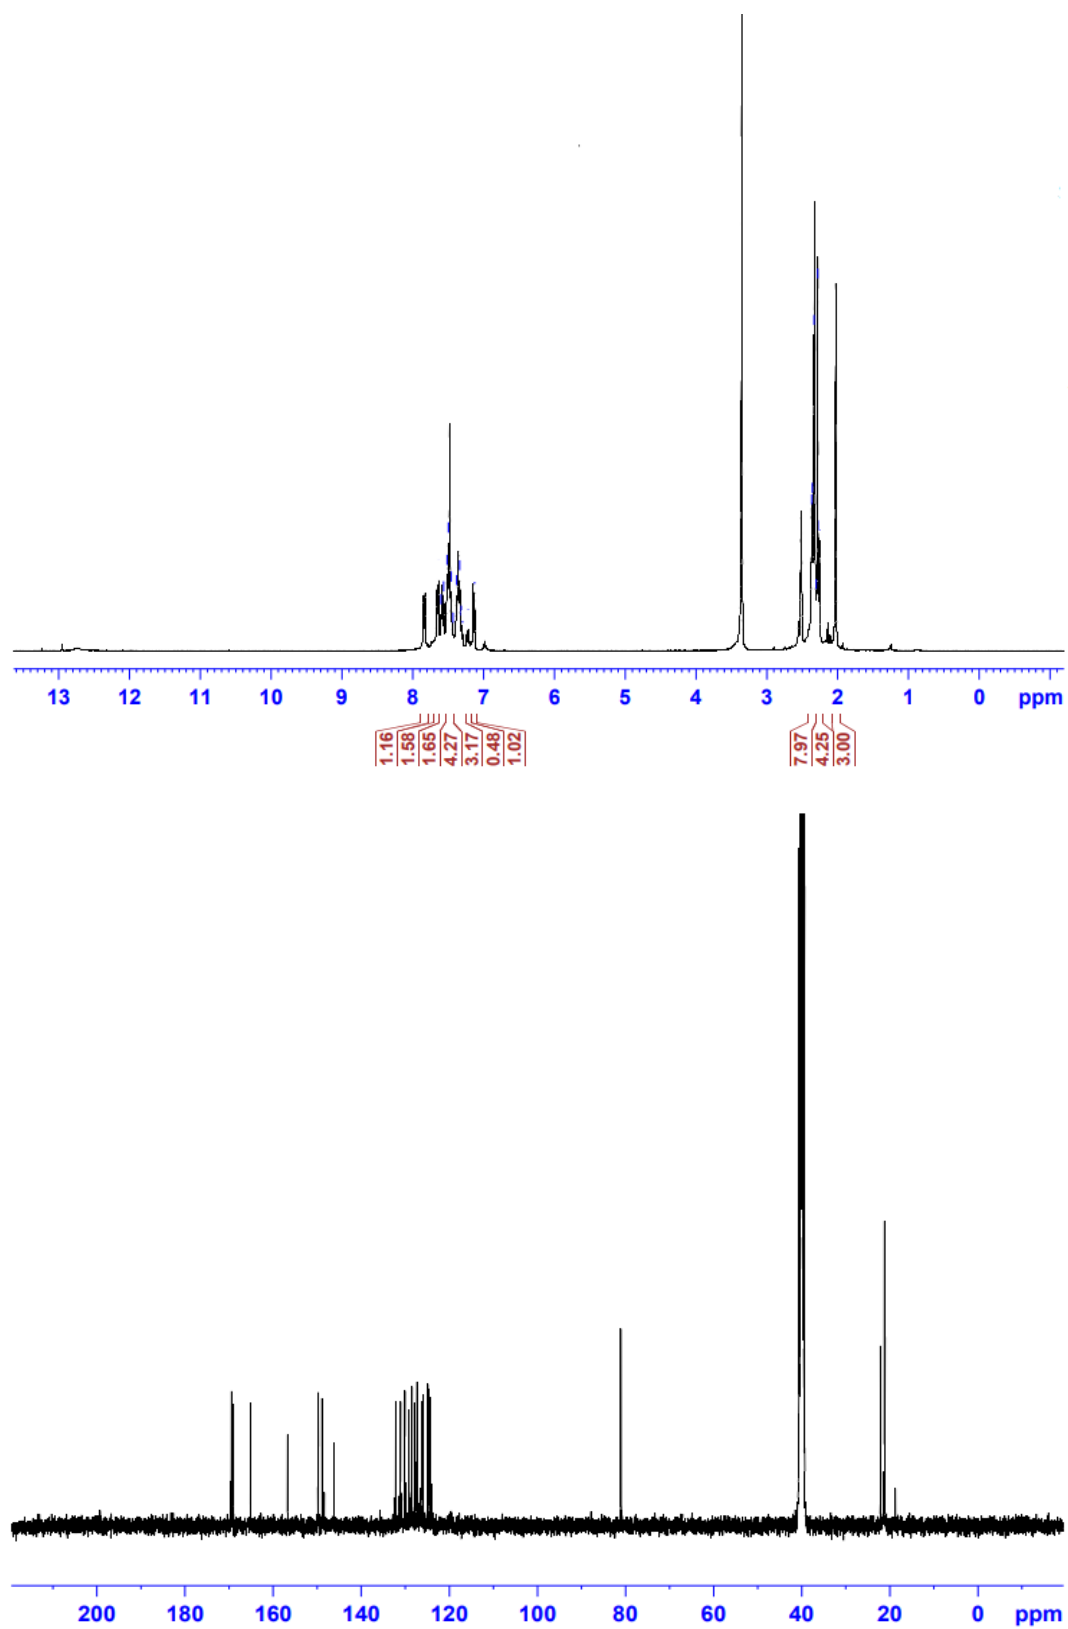

Figure S6a.  $^1\text{H}$  NMR and  $^{13}\text{C}$  NMR spectra of compound 6a

Abundance

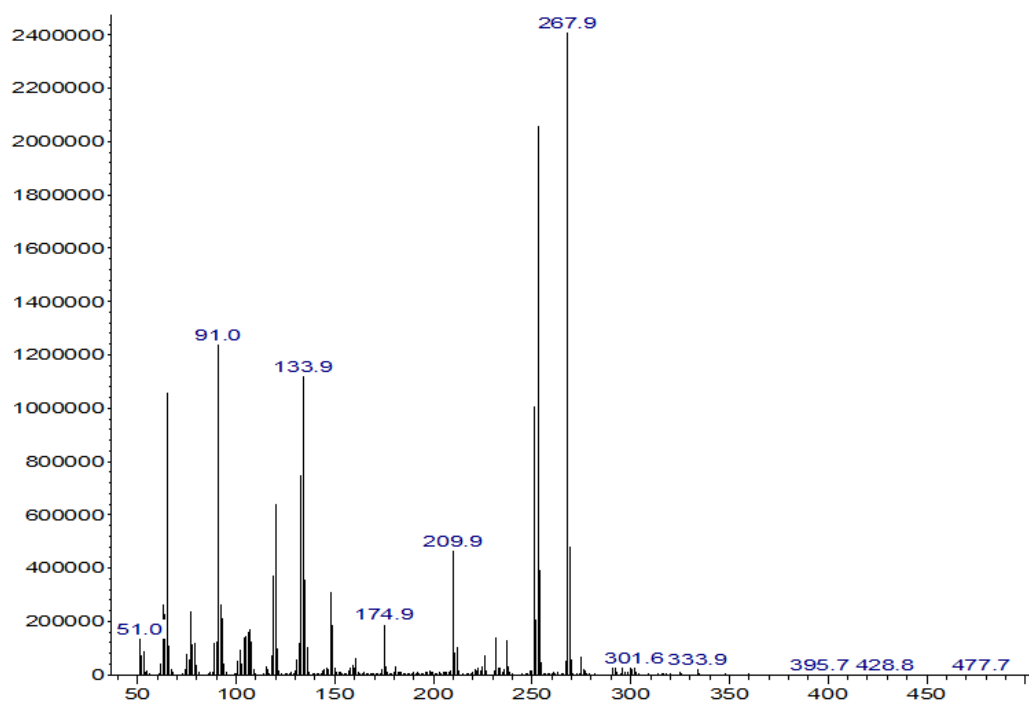

Figure S6a. Mass spectra of compound 6a

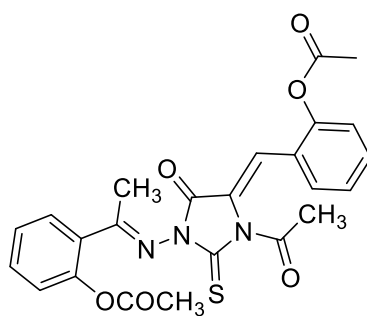

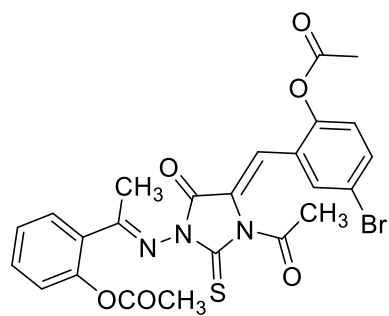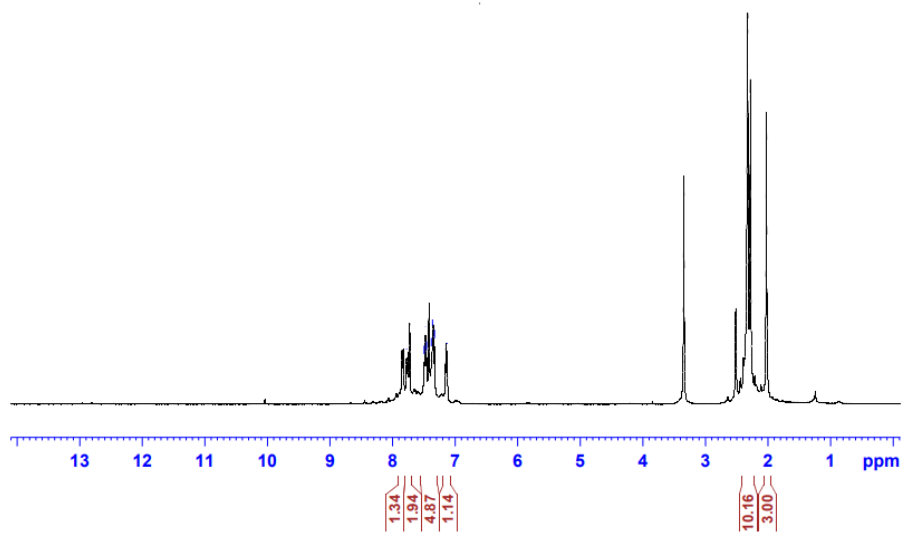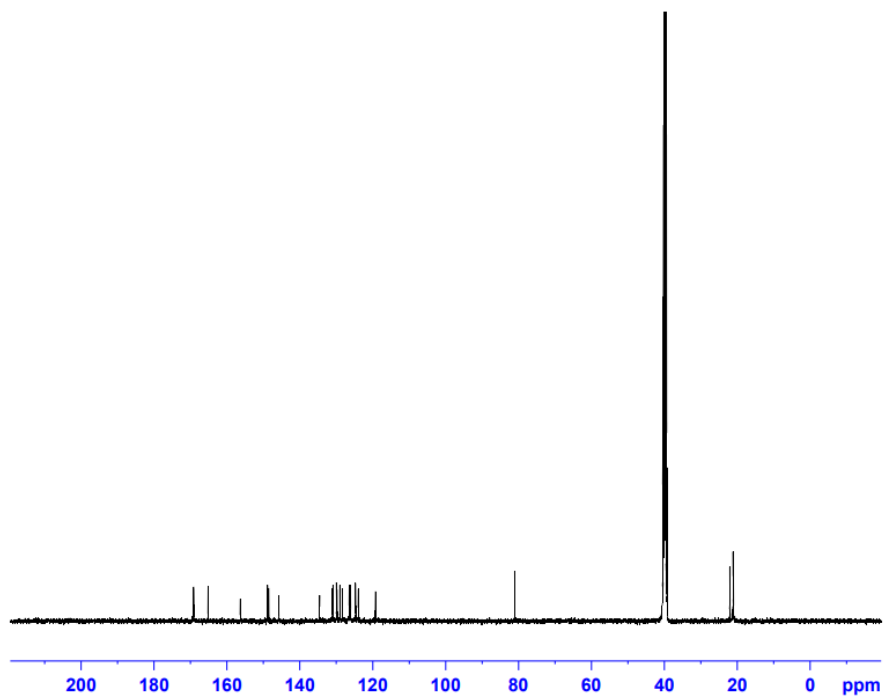

Figure S7. <sup>1</sup>H NMR and <sup>13</sup>C NMR spectra of compound 6b

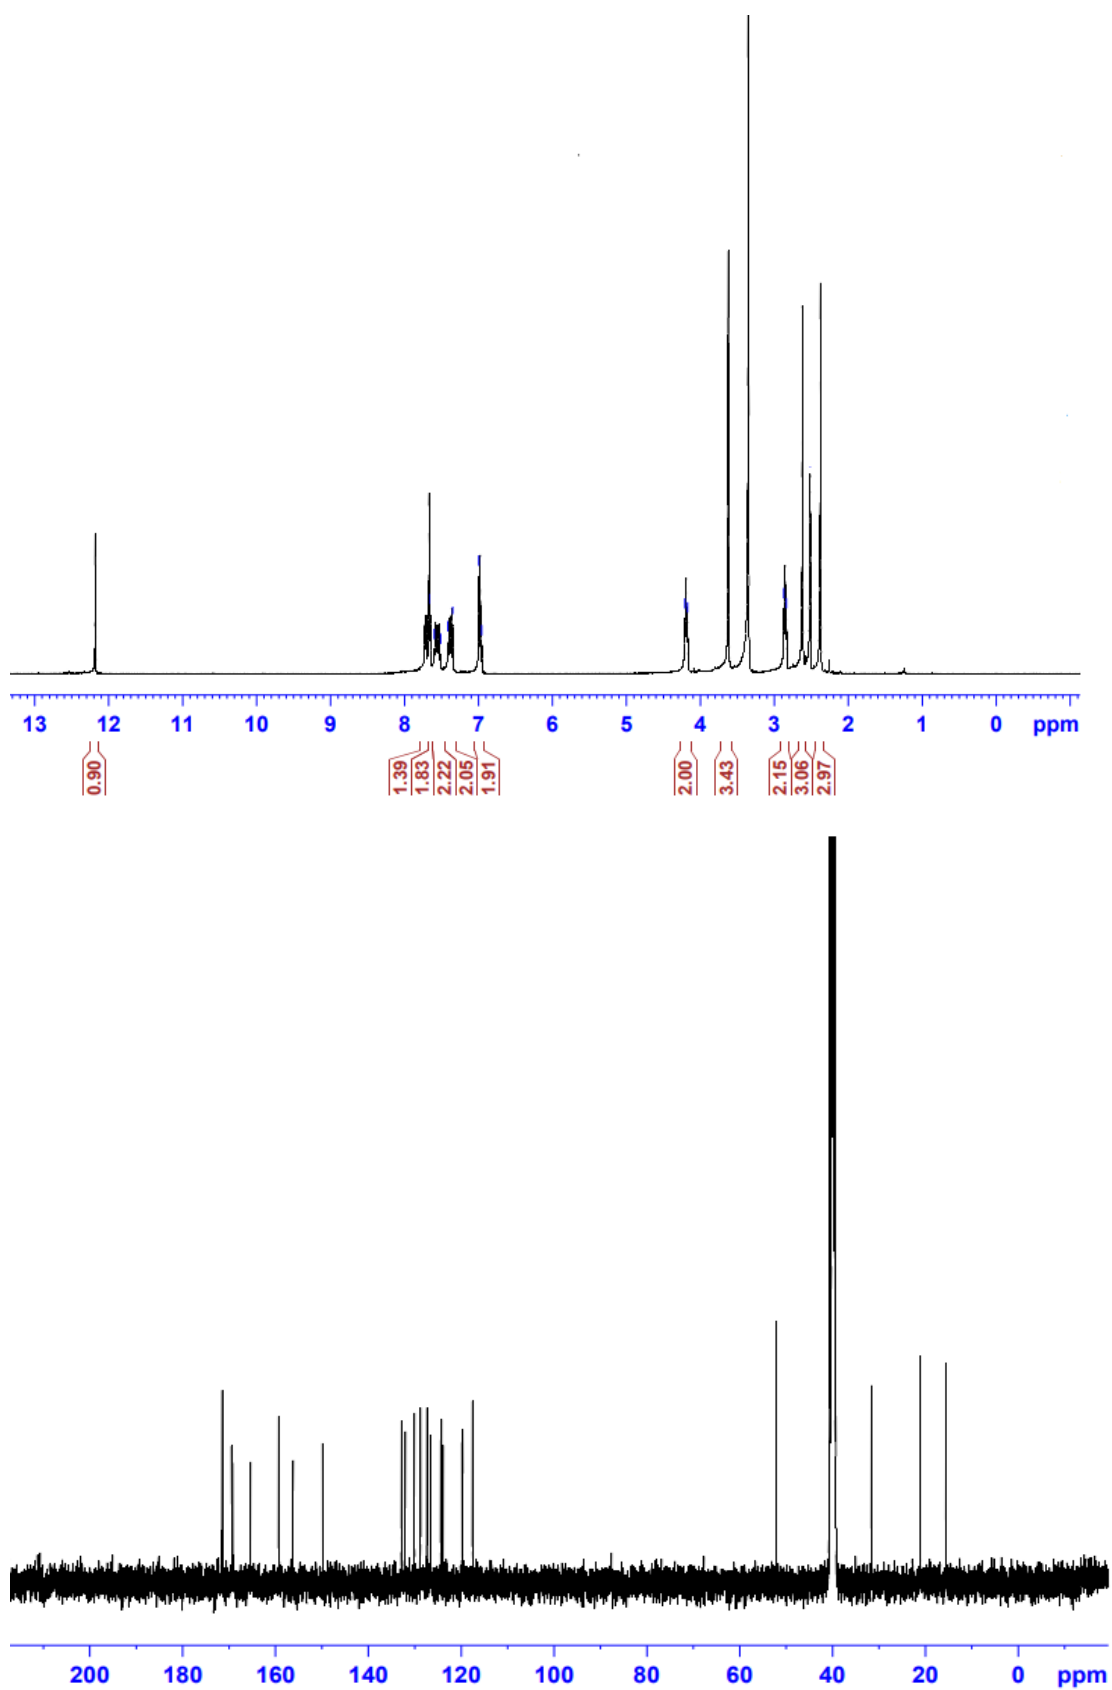

Figure S8a.  $^1\text{H}$  NMR and  $^{13}\text{C}$  NMR spectra of compound 7a

Abundance

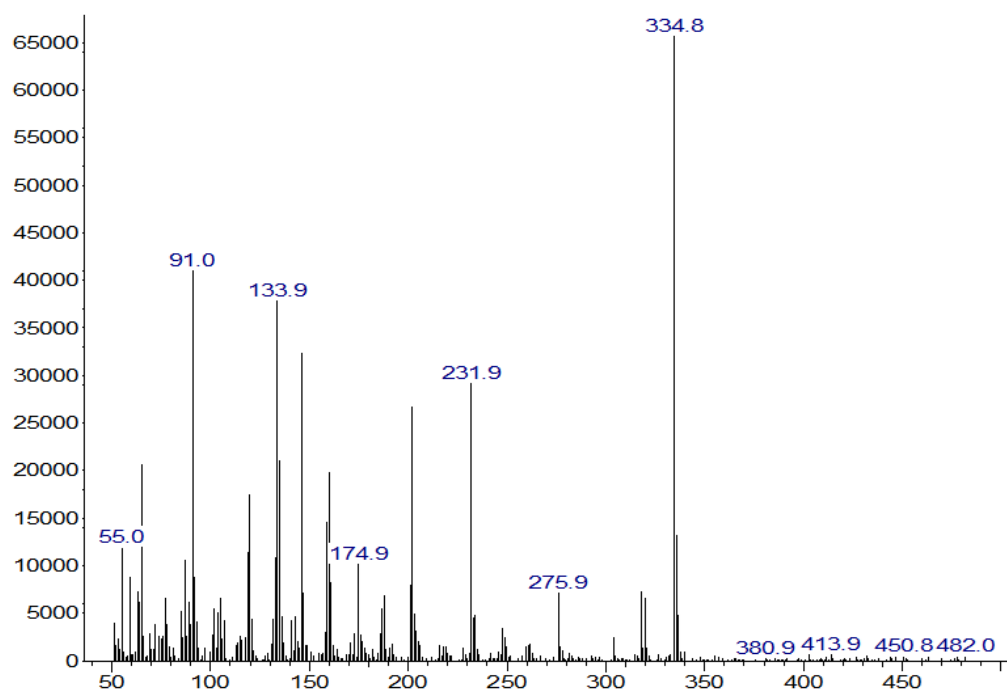

Figure S8b. Mass spectra of compound 7a

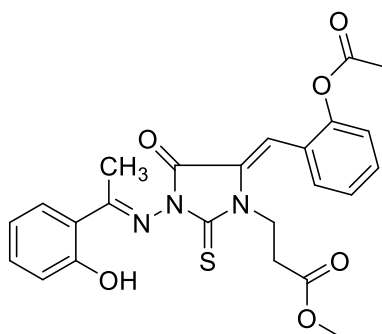

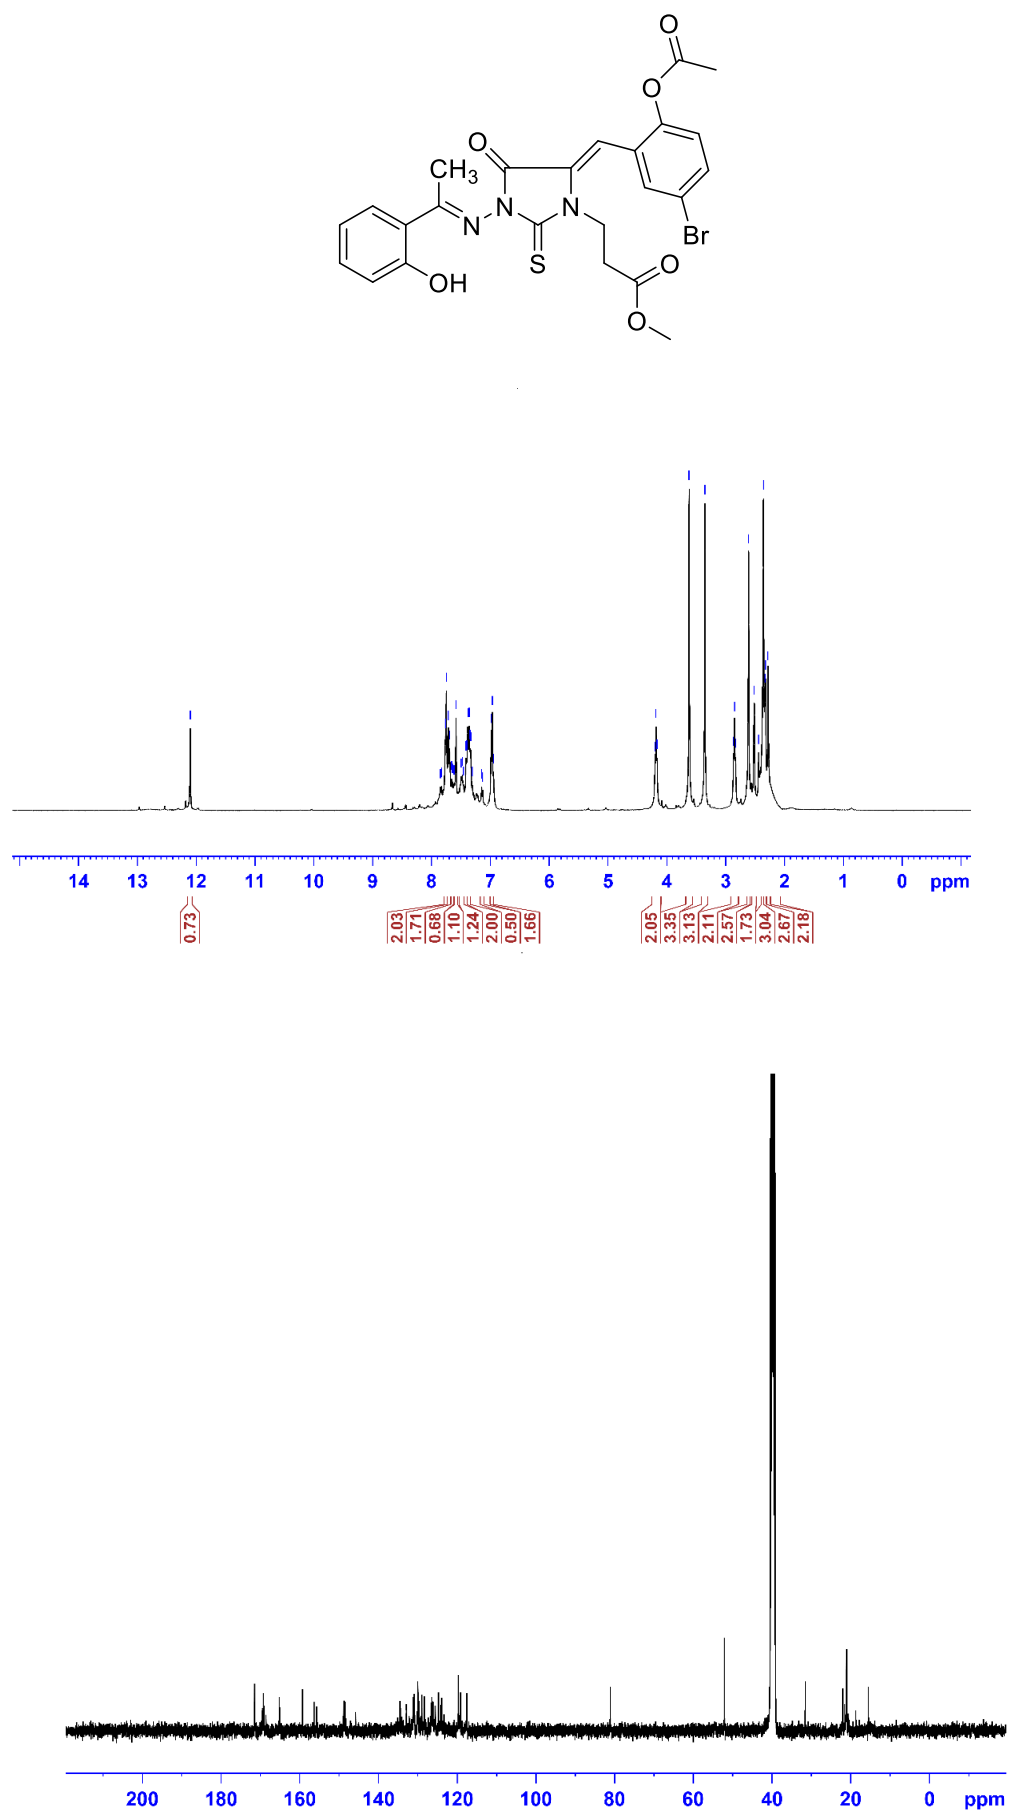

Figure S9.  $^1\text{H}$  NMR and  $^{13}\text{C}$  NMR spectra of compound 7b

### **Mass spectrometry investigation**

The mass spectral fragmentation modes of the prepared 1,3,5-trisubstituted-imidazolidinones (**4a**, **5a**, **6a**, and **7a**) have been investigated. The mass spectra of compounds 4a-7a showed that the molecular ions of these compounds are unstable.

#### **Compounds 4a and 6a:**

Compounds 4a and 6a showed unstable molecular ions of these compounds in the mass spectra but underwent fragmentation with rearrangement to produce the stable ion peaks at  $m/z$  257 and  $m/z$  268, respectively (Scheme S1). The ion of  $m/z$  353 of compounds 4a and 6a were also found to undergo fragmentation to produce the peak at  $m/z$  134, 119, and  $m/z$  91, respectively.

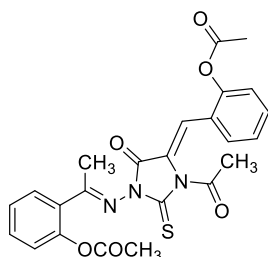

**6a**

m/z 479 (unstable)

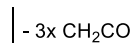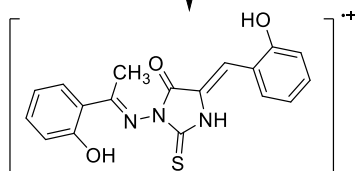

**4a**

m/z 353 (unstable)

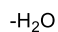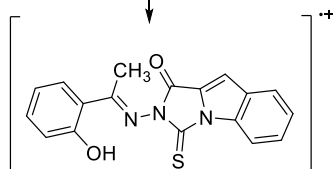

m/z 335 (1.30)

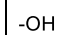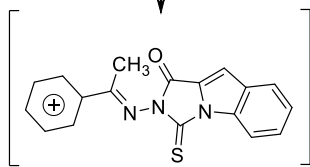

m/z 318 (16.40)

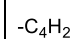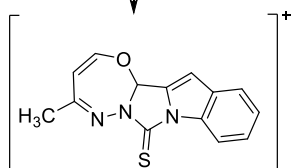

m/z 268 (100), 6a

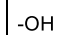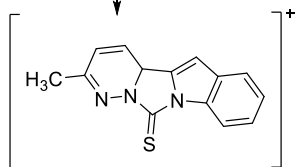

m/z 251 (100), 4a

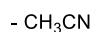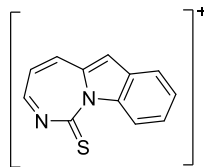

m/z 210 (18.70)

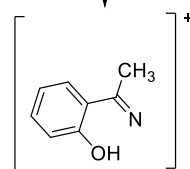

m/z 134 (45.11)

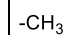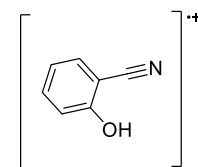

m/z 119 (15.08)

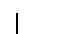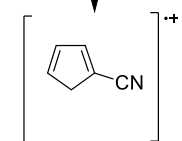

m/z 91 (49.87)



**Scheme S1:** The represented mass fragmentation pattern of compounds **4a** and **6a**  
**Compounds 5a and 7a:**

The molecular ion peaks of compounds **5a** and **7a** were observed at  $m/z$  439 and 481, respectively, unstable. The molecular ions of these compounds were fragmented with rearrangement to give stable ion peaks at  $m/z$  335 (scheme S2). The stable ion peak at  $m/z$  335 underwent fragmentation to produce the ion peak at  $m/z$  134, 119, and 91, respectively. Further, the ion at  $m/z$  353 underwent fragmentation to give ion peaks at  $m/z$  260.

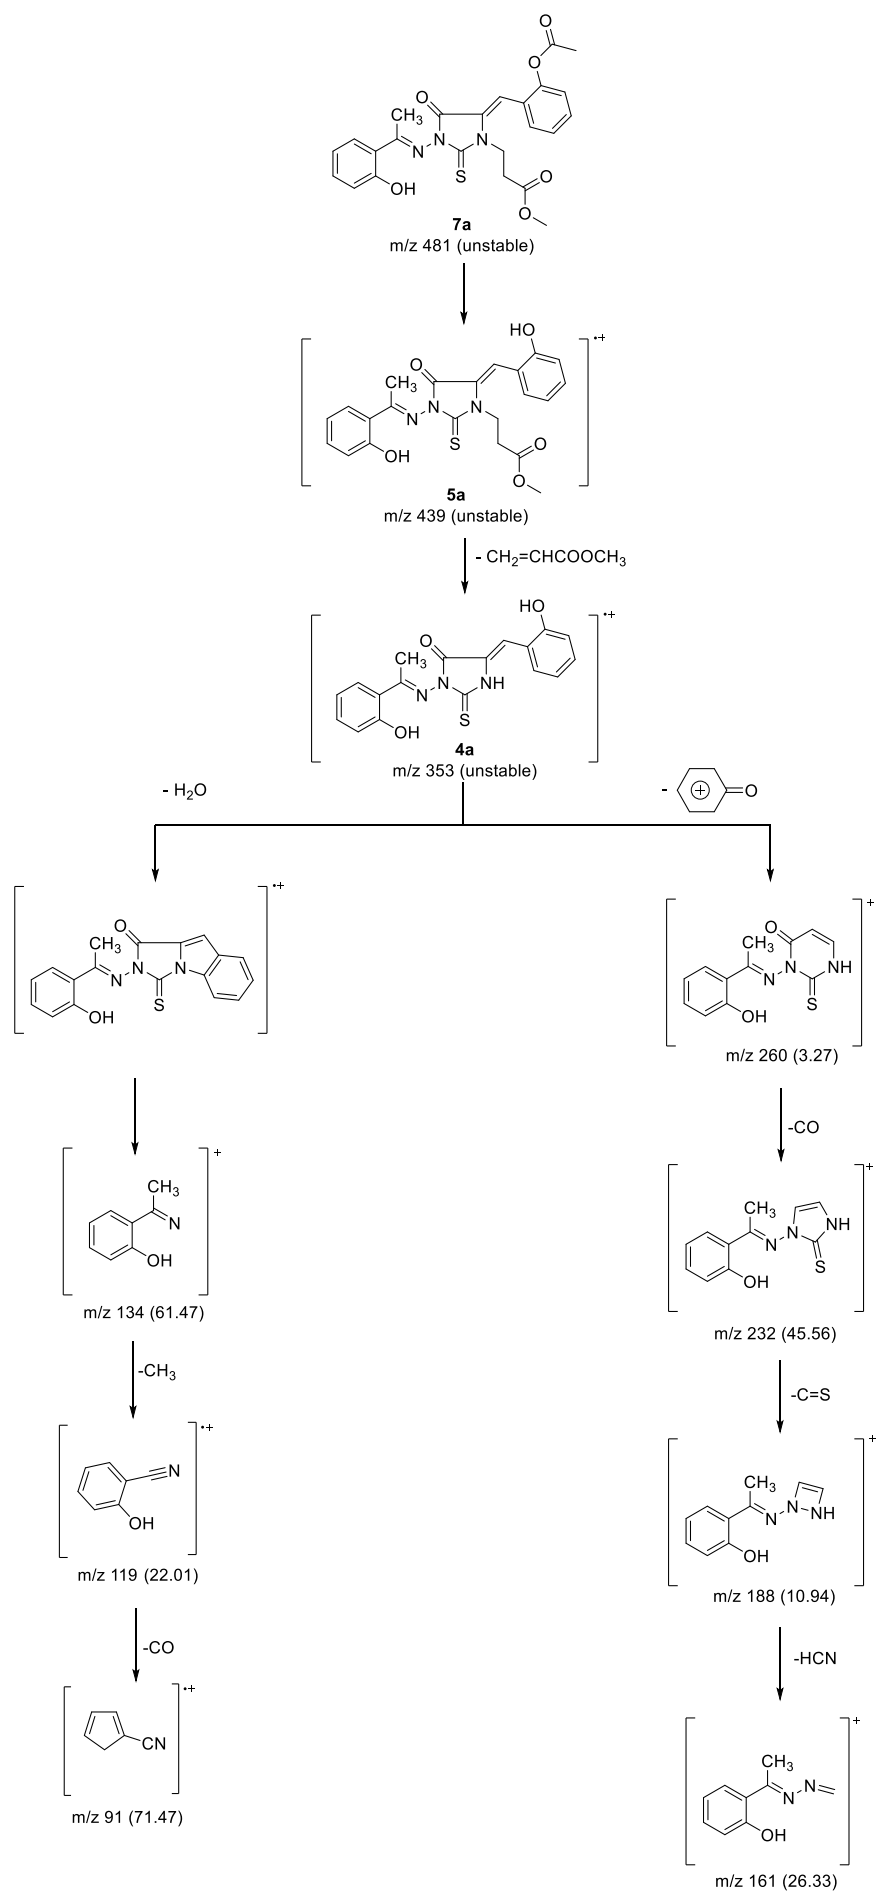

**Scheme S2:** The represented mass fragmentation pattern of compounds **4a** and **6a**

**Table S1:** Inhibitory activities of 1,3,5-trisubstituted-2-thioxoimidazolidin-4-ones compounds toward  $\alpha$ -glucosidase activity.

**Compound 4a**

| log | %inh |
|-----|------|
| 3   | 83.1 |
| 2   | 62.6 |
| 1   | 44.9 |
| 0   | 24.5 |

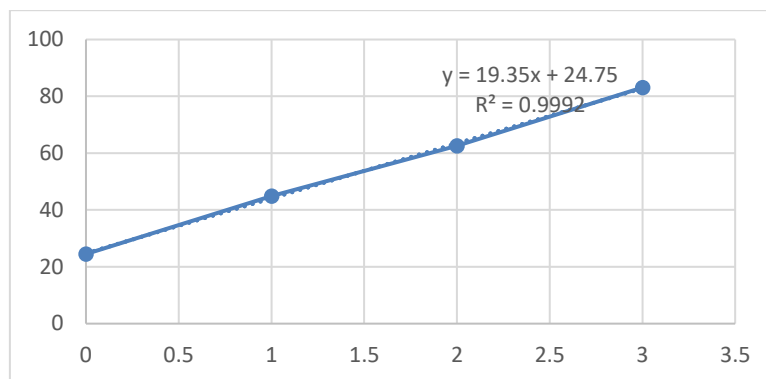

**Compound 4b**

| log | %inh |
|-----|------|
| 3   | 84.7 |
| 2   | 58.9 |
| 1   | 36.4 |
| 0   | 20.4 |

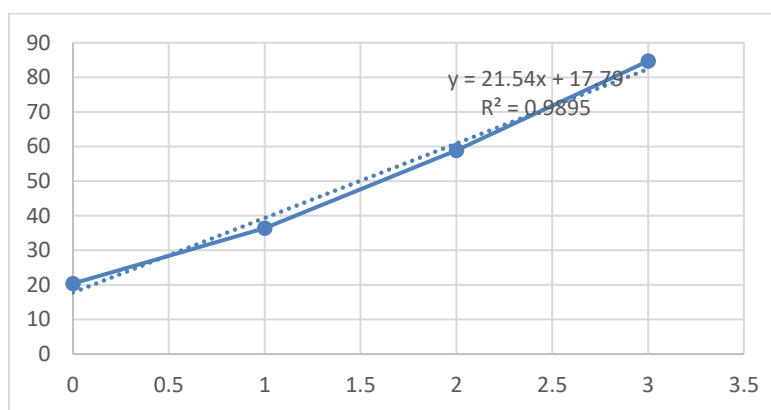

**Compound 5a**

| log | %inh |
|-----|------|
| 3   | 86   |
| 2   | 75   |
| 1   | 58   |
| 0   | 35   |

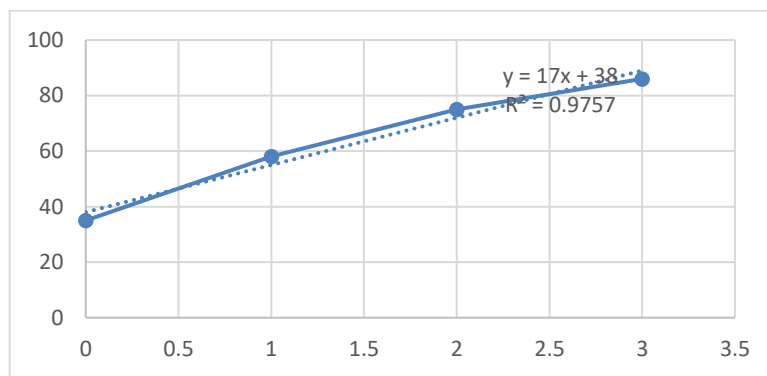

**Compound 5b**

| log | %inh |
|-----|------|
| 3   | 87.4 |
| 2   | 71.4 |
| 1   | 50.3 |
| 0   | 27.6 |

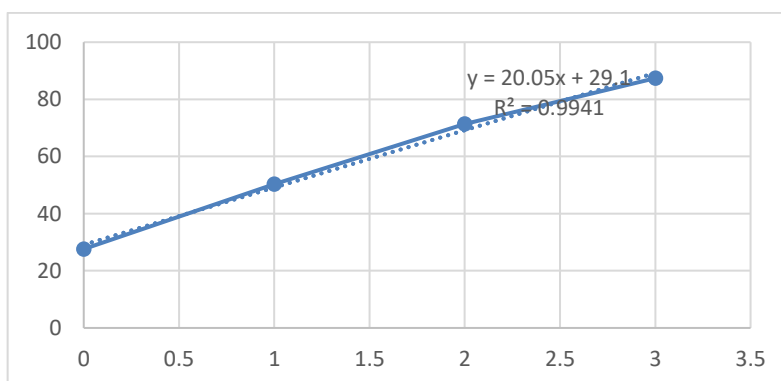

### Compound 7a

| log | %inh |
|-----|------|
| 3   | 82.6 |
| 2   | 66.1 |
| 1   | 48.3 |
| 0   | 21.8 |

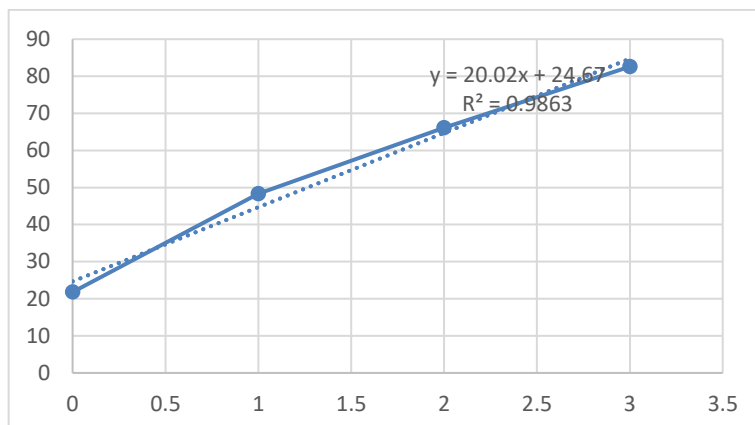

### Compound 7b

| log | %inh |
|-----|------|
| 3   | 86.5 |
| 2   | 70.4 |
| 1   | 47.8 |
| 0   | 28   |

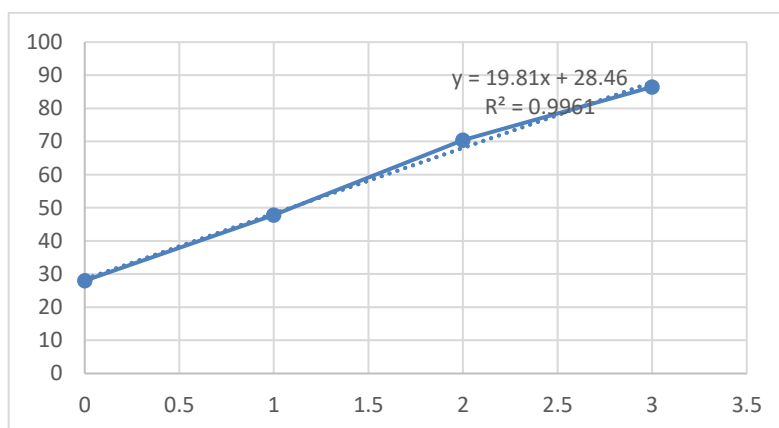

### Acarbose

| log | %inh |
|-----|------|
| 3   | 88.4 |
| 2   | 76.9 |
| 1   | 58.4 |
| 0   | 31.8 |

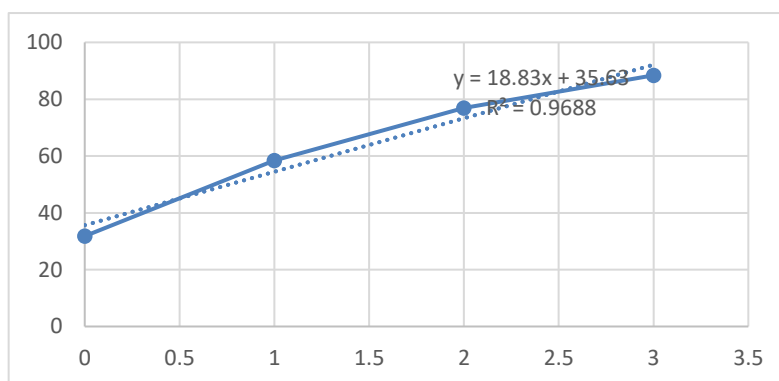

**Table S2:** Inhibitory activities of 1,3,5-trisubstituted-2-thioxoimidazolidin-4-ones derivatives toward  $\alpha$ -amylase activity.

**Compound 4a**

| log | %inh |
|-----|------|
| 2   | 81.9 |
| 1   | 61.4 |
| 0   | 44.1 |
| -1  | 21.6 |

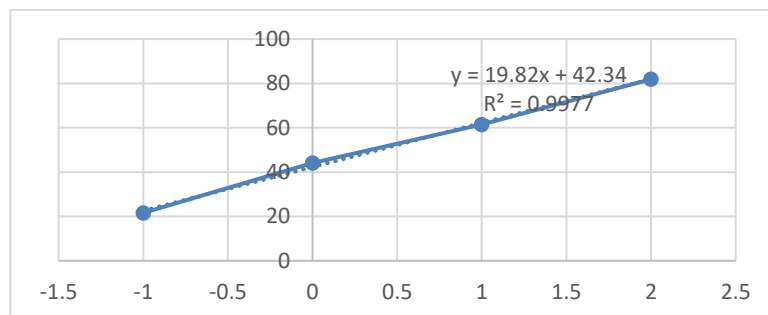

**Compound 4b**

| log | %inh |
|-----|------|
| 2   | 81.4 |
| 1   | 58.7 |
| 0   | 30.1 |
| -1  | 15.3 |

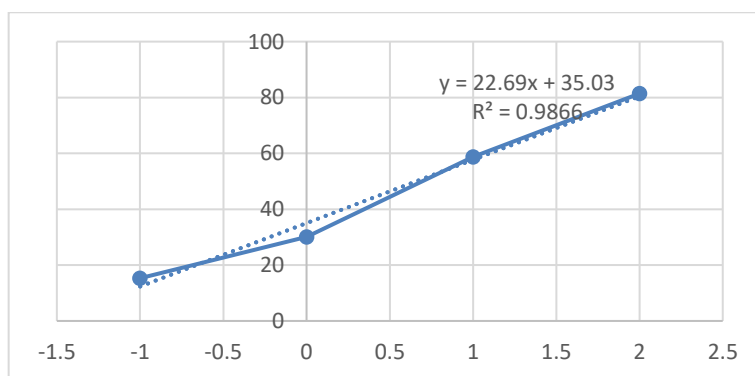

**Compound 5a**

| log | %inh |
|-----|------|
| 2   | 88.8 |
| 1   | 77.9 |
| 0   | 63.4 |
| -1  | 42.6 |

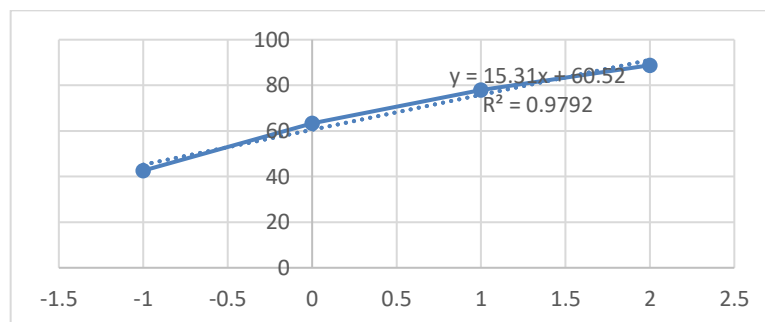

**Compound 5b**

| log | %inh |
|-----|------|
| 2   | 84.7 |
| 1   | 67.5 |
| 0   | 53.1 |
| -1  | 29   |

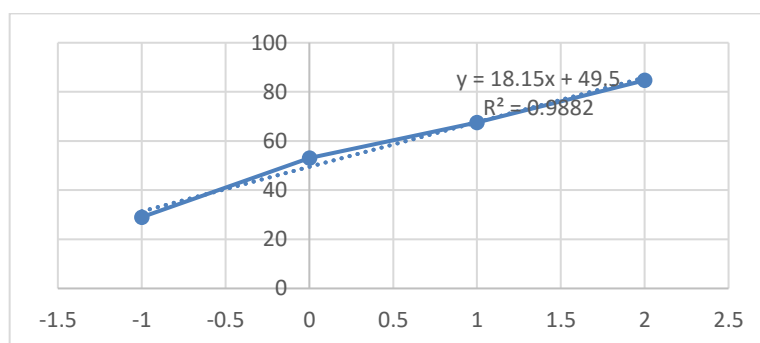

### Compound 7a

| log | %inh |
|-----|------|
| 2   | 84.8 |
| 1   | 76.6 |
| 0   | 54   |
| -1  | 30.8 |

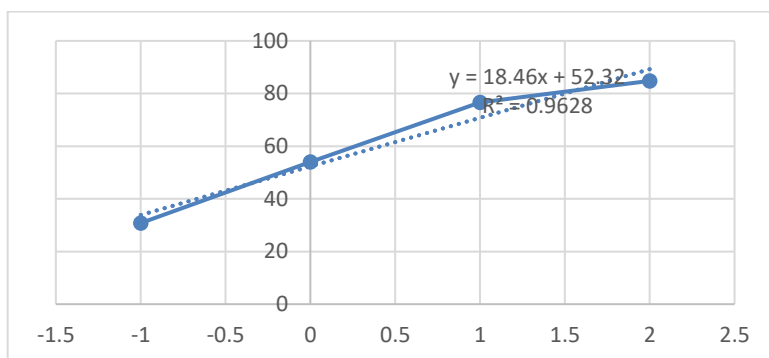

### Compound 7b

| log | %inh |
|-----|------|
| 2   | 87.6 |
| 1   | 65.2 |
| 0   | 43.3 |
| -1  | 27.5 |

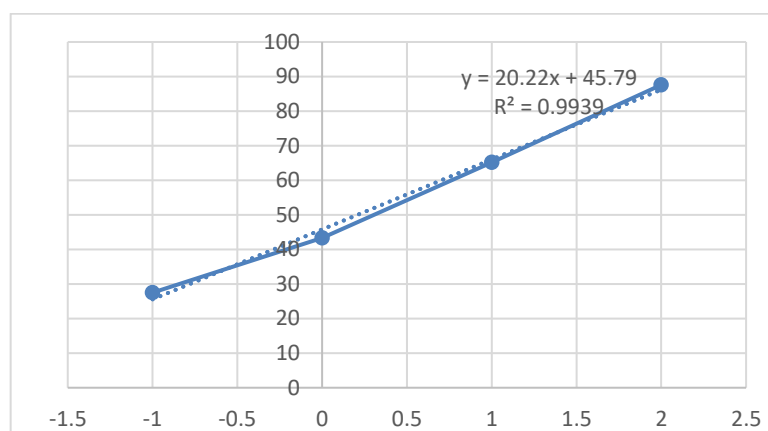

### Acarbose

| log | %inh |
|-----|------|
| 2   | 92.1 |
| 1   | 80.3 |
| 0   | 58.3 |
| -1  | 37.2 |

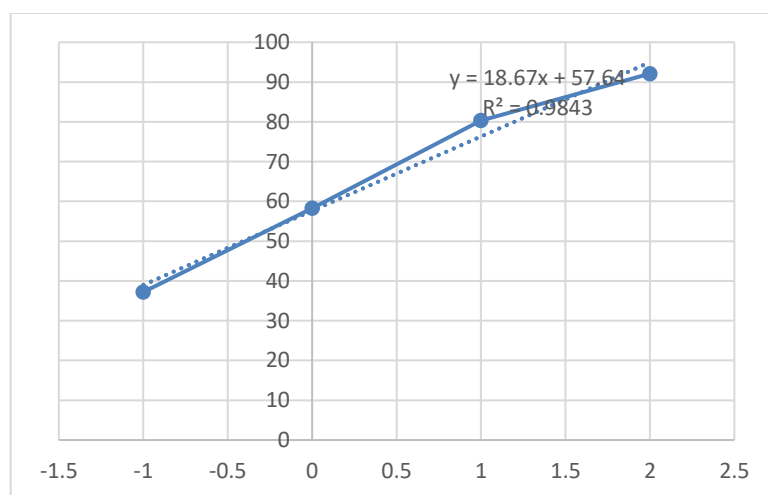

**Table S3:** In vitro cytotoxicity of compounds (**5a** and **7a**) against WI-38 cells.

| Compounds        | WI-38 Cytotoxicity                 | SD<br>± |
|------------------|------------------------------------|---------|
|                  | IC <sub>50</sub><br>ug/ml<br>WI-38 |         |
| <b>5a</b>        | 88.538                             | 3.92    |
| <b>7a</b>        | 109.31                             | 4.84    |
| <b>Celecoxib</b> | 93.054                             | 4.12    |

#### Compound 5a

| log conc. | % viability |
|-----------|-------------|
| 3         | 34.56       |
| 2.398     | 44.07       |
| 1.799     | 52.91       |
| 1.204     | 59.79       |
| 0.602     | 69.02       |

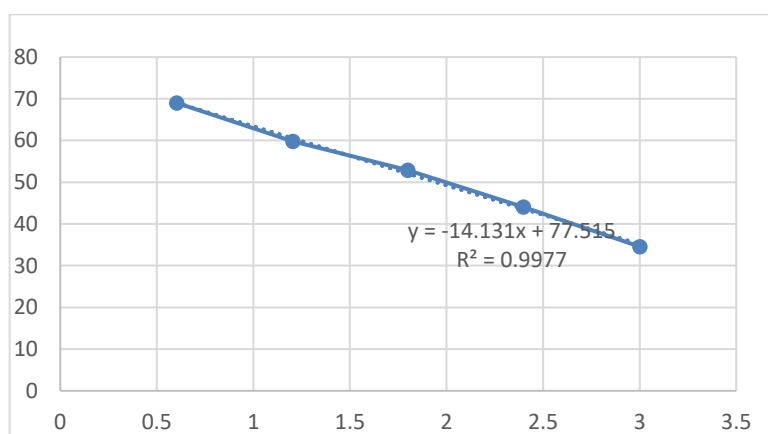

#### Compound 7a

| log conc. | % viability |
|-----------|-------------|
| 3         | 36.63       |
| 2.39794   | 44.07       |
| 1.79934   | 53.41       |
| 1.20412   | 60.63       |
| 0.60206   | 72.99       |

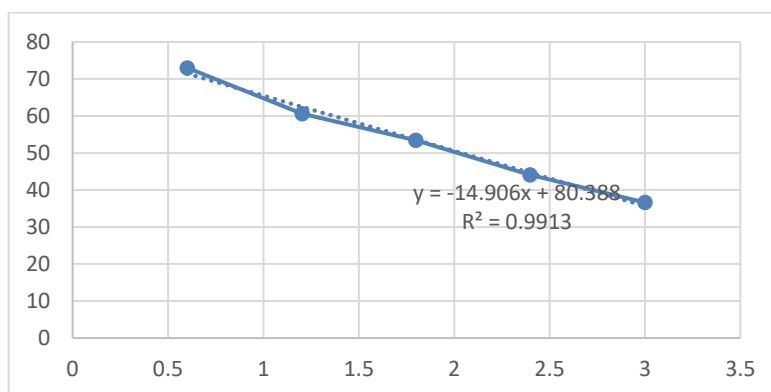

#### CXB/WI38

| log conc. | % viability |
|-----------|-------------|
| 3         | 35.4        |
| 2.398     | 42.99       |
| 1.799     | 54.24       |
| 1.204     | 61.66       |
| 0.602     | 67.26       |

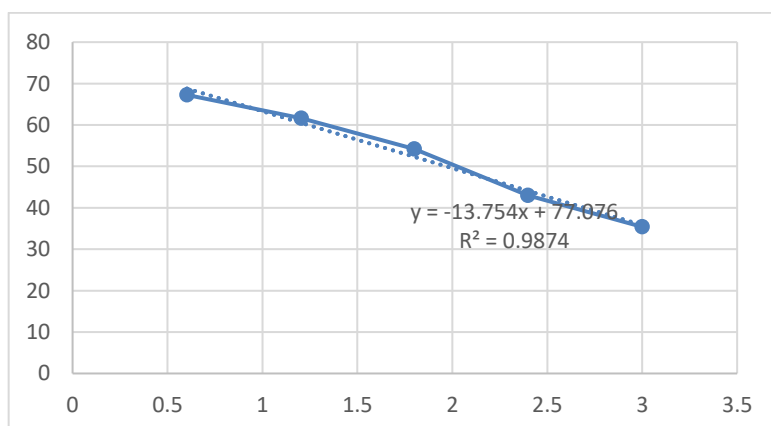



**Table S4:** Effect of Compounds (**5a** and **7a**) on scavenging DPPH free radical.

**Compound 5a**

| conc | %RSA    |
|------|---------|
| 200  | 90.9673 |
| 100  | 84.0278 |
| 50   | 65.3256 |
| 25   | 49.2589 |
| 12.5 | 34.2    |
| 6.25 | 25.9268 |
| 3.12 | 12.8385 |

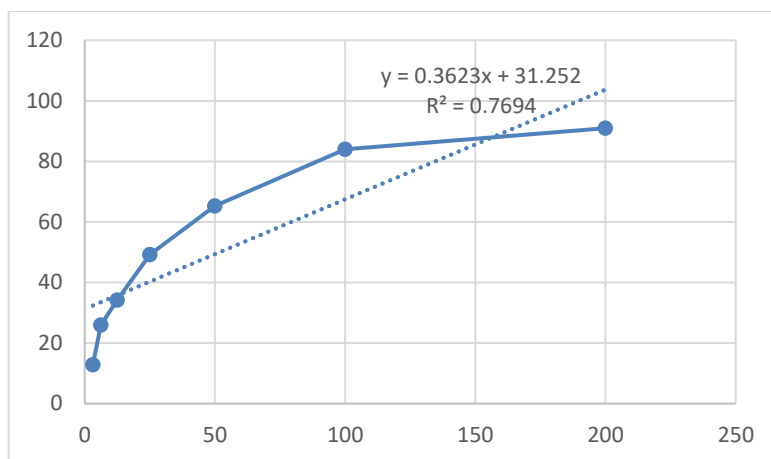

**Compound 7a**

| conc | %RSA    |
|------|---------|
| 200  | 80.732  |
| 100  | 81.6087 |
| 50   | 62.2992 |
| 25   | 45.4635 |
| 12.5 | 30.2839 |
| 6.25 | 18.9636 |
| 3.12 | 9.7382  |

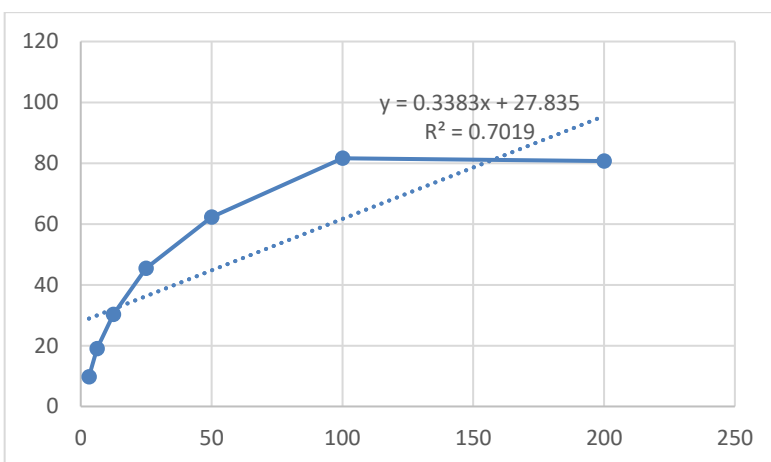

**Torolox**

| conc | %RSA    |
|------|---------|
| 200  | 89.0026 |
| 100  | 82.6087 |
| 50   | 63.2992 |
| 25   | 47.4425 |
| 12.5 | 32.4808 |
| 6.25 | 20.2046 |
| 3.12 | 11.3811 |

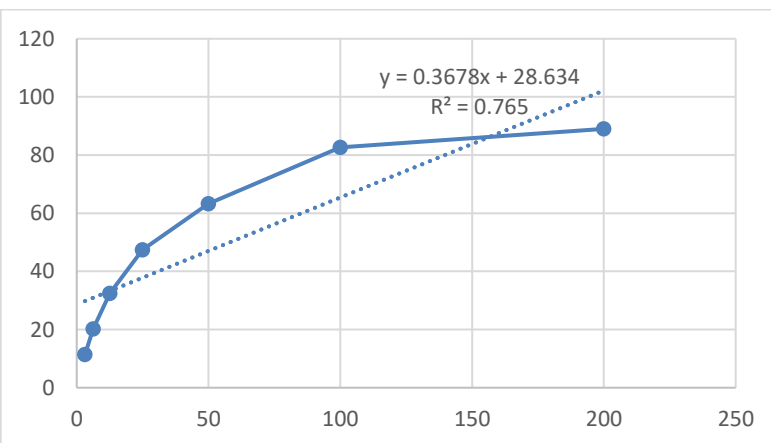

| Compounds      | Scavenging free radical<br>DPPH IC50<br>ug/ml | SD  |
|----------------|-----------------------------------------------|-----|
|                |                                               | ±   |
| <b>5a</b>      | 51.75                                         | 5.2 |
| <b>7a</b>      | 65.5                                          | 5.6 |
| <b>Torolox</b> | 58.09                                         | 3.1 |

**Table S5:** Effect of Compounds (**5a** and **7a**) on ROS generation.

| Compounds        | ROS<br>Pg/ml      |
|------------------|-------------------|
| <b>5a</b>        | <b>132.4±2.16</b> |
| <b>7a</b>        | <b>191.5±3.62</b> |
| <b>Celecoxib</b> | <b>171.6±1.89</b> |
| <b>Control</b>   | <b>90.74±5.54</b> |
